# Supplementary material for: Association between Maternal Blood Glucose Levels during Pregnancy and Birth Outcomes: A Birth Cohort Study
Source: MDPI journal article supplement (doi:10.3390/ijerph20032102), 2023-01-24
Supplement: s1 [file s1]

**Supplementary table S1.** The autocorrelations between covariates.

| r                 | Age     | Education | BMI     | Household income | First pregnancy | Complications | GWG     | Insulin injection |
|-------------------|---------|-----------|---------|------------------|-----------------|---------------|---------|-------------------|
| Age               | 1.0000  | 0.0006    | 0.0108  | 0.0332           | -0.2457         | 0.0614        | 0.0136  | 0.0061            |
| Education         | 0.0006  | 1.0000    | -0.0910 | 0.2689           | 0.1144          | -0.0188       | -0.0744 | 0.0061            |
| BMI               | 0.0108  | -0.0910   | 1.0000  | -0.0555          | -0.0143         | 0.0354        | 0.1808  | 0.0345            |
| Household income  | 0.0332  | 0.2689    | -0.0555 | 1.0000           | -0.0454         | 0.0243        | -0.0316 | -0.0043           |
| First pregnancy   | -0.2457 | 0.1144    | -0.0143 | -0.0454          | 1.0000          | -0.2490       | -0.0257 | -0.0054           |
| Complications     | 0.0614  | -0.0188   | 0.0354  | 0.0243           | -0.2490         | 1.0000        | 0.0158  | 0.0190            |
| GWG               | 0.0136  | -0.0744   | 0.1808  | -0.0316          | -0.0257         | 0.0158        | 1.0000  | -0.0010           |
| Insulin injection | 0.0061  | 0.0061    | 0.0345  | -0.0043          | -0.0054         | 0.0190        | -0.0010 | 1.0000            |

**Supplementary table S2.** Association between pregnancy hyperglycemia and birth weight and macrosomia in different subgroups.

|                                           | Birth weight                                           |          | Macrosomia                             |          |
|-------------------------------------------|--------------------------------------------------------|----------|----------------------------------------|----------|
|                                           | <i>Adjusted <math>\beta</math> (95%CI)<sup>a</sup></i> | <i>P</i> | <i>Adjusted OR (95%CI)<sup>a</sup></i> | <i>P</i> |
| Age                                       |                                                        |          |                                        |          |
| < 35                                      | 65.62 (46.26, 84.98)                                   | <0.001   | 1.58 (1.28, 1.94)                      | <0.001   |
| $\geq 35$                                 | 17.85 (-37.23, 72.94)                                  | 0.525    | 1.39 (0.72, 2.71)                      | 0.324    |
| Education                                 |                                                        |          |                                        |          |
| Senior high school or lower               | 62.93 (10.50, 115.36)                                  | 0.019    | 1.51 (0.89, 2.56)                      | 0.128    |
| Junior or regular college                 | 69.11 (47.66, 90.55)                                   | <0.001   | 1.56 (1.24, 1.97)                      | <0.001   |
| Graduate or above                         | 4.91 (-41.91, 51.73)                                   | 0.837    | 1.59 (0.89, 2.85)                      | 0.120    |
| BMI before pregnancy (kg/m <sup>2</sup> ) |                                                        |          |                                        |          |
| Underweight (< 18.5)                      | 13.80 (-41.06, 68.66)                                  | 0.622    | 1.25 (0.57, 2.76)                      | 0.571    |
| Normal (18.5 ~ 23.9)                      | 51.13 (29.37, 72.89)                                   | <0.001   | 1.51 (1.17, 1.96)                      | 0.002    |
| Overweight (24.0 ~ 27.9)                  | 110.50 (64.80, 156.19)                                 | <0.001   | 1.88 (1.26, 2.80)                      | 0.002    |
| Obesity ( $\geq 28.0$ )                   | 94.24 (-19.35, 207.83)                                 | 0.104    | 1.06 (0.48, 2.33)                      | 0.881    |
| Household income                          |                                                        |          |                                        |          |

|                             |                       |        |                   |        |
|-----------------------------|-----------------------|--------|-------------------|--------|
| Low                         | 93.59 (42.08, 145.09) | <0.001 | 2.02 (1.17, 3.48) | 0.012  |
| Medium                      | 62.89 (40.73, 85.04)  | <0.001 | 1.52 (1.19, 1.93) | <0.001 |
| High                        | 31.59 (-9.71, 72.88)  | 0.134  | 1.42 (0.89, 2.25) | 0.140  |
| Gestational weight gain /kg |                       |        |                   |        |
| Appropriate                 | 72.65 (45.99, 99.31)  | <0.001 | 1.72 (1.26, 2.34) | <0.001 |
| Insufficient                | 3.86 (-29.86, 37.58)  | 0.823  | 1.08 (0.63, 1.94) | 0.792  |
| Excessive                   | 95.44 (58.98, 131.89) | <0.001 | 1.55 (1.16, 2.06) | 0.003  |
| First pregnancy             |                       |        |                   |        |
| No                          | 56.03 (28.91, 83.14)  | <0.001 | 1.48 (1.21, 1.96) | 0.006  |
| Yes                         | 64.35 (39.62, 89.09)  | <0.001 | 1.62 (1.22, 2.06) | <0.001 |

<sup>a</sup> Adjusted for: maternal age, education, household income, BMI before pregnancy, gestational weight gain, first pregnancy, complications from previous pregnancy, insulin injection and gestational week, respectively.

**Supplementary table S3.** Multivariate analysis of abnormal blood glucose levels during pregnancy and birth outcomes.

| Blood glucose during pregnancy<br>(normal vs abnormal) | FPG <sup>c</sup>     |          | 1-h PG <sup>c</sup>  |          | 2-h PG <sup>c</sup>  |          |
|--------------------------------------------------------|----------------------|----------|----------------------|----------|----------------------|----------|
|                                                        | <i>Adjusted</i>      |          | <i>Adjusted</i>      |          | <i>Adjusted</i>      |          |
|                                                        | <i>β/OR (95%CI)</i>  | <i>P</i> | <i>β/OR (95%CI)</i>  | <i>P</i> | <i>β/OR (95%CI)</i>  | <i>P</i> |
| Birth weight                                           |                      |          |                      |          |                      |          |
| Birth weight/g <sup>a</sup>                            | 76.64 (56.32, 96.96) | <0.001   | 21.87 (-7.23, 50.97) | 0.141    | 32.79 (3.25, 62.33)  | 0.030    |
| Birth weight Z score <sup>b</sup>                      | 0.17 (0.12, 0.21)    | <0.001   | 0.04 (-0.02, 0.11)   | 0.189    | 0.07 (-0.01, 0.13)   | 0.055    |
| Birth weight Z centile <sup>b</sup>                    | 5.02 (3.67, 6.37)    | <0.001   | 1.61 (-0.32, 3.54)   | 0.101    | 1.80 (-0.16, 3.76)   | 0.072    |
| LBW <sup>a</sup>                                       | 1.00 (0.67, 1.49)    | 0.985    | 1.27 (0.76, 2.12)    | 0.357    | 0.74 (0.41, 1.35)    | 0.332    |
| Macrosomia <sup>a</sup>                                | 1.66 (1.34, 2.04)    | <0.001   | 1.35 (0.97, 1.86)    | 0.072    | 1.61 (1.17, 2.21)    | 0.003    |
| Gestational age                                        |                      |          |                      |          |                      |          |
| Gestational age/week <sup>b</sup>                      | -0.08 (-0.15, -0.01) | 0.033    | -0.14 (-0.24, -0.04) | 0.007    | -0.11 (-0.21, -0.01) | 0.044    |
| Premature birth <sup>b</sup>                           | 1.23 (0.97, 1.56)    | 0.091    | 1.07 (0.77, 1.49)    | 0.693    | 0.86 (0.60, 1.23)    | 0.407    |
| SGA and LGA                                            |                      |          |                      |          |                      |          |
| SGA <sup>b</sup>                                       | 0.86 (0.66, 1.13)    | 0.282    | 1.21 (0.87, 1.69)    | 0.263    | 1.23 (0.88, 1.72)    | 0.218    |
| LGA <sup>b</sup>                                       | 1.52 (1.31, 1.78)    | <0.001   | 1.09 (0.86, 1.38)    | 0.477    | 1.36 (1.08, 1.72)    | 0.009    |

<sup>a</sup> Adjusted for: maternal age, education, household income, BMI before pregnancy, gestational weight gain, first pregnancy, complications from previous pregnancy, insulin injection and gestational week; <sup>b</sup> Adjusted for: maternal age, education, household income, BMI before pregnancy, gestational weight gain, first pregnancy, complications from previous pregnancy and insulin injection; <sup>c</sup> After evaluating Pearson Chi-Square and C statistics, multivariate regression models showed an appropriate goodness of fit.

**Supplementary table S4.** Association of blood glucose levels and maternal weight before delivery (N=10010).

|        | Univariate analysis |          | Multivariate analysis <sup>a</sup> |          |
|--------|---------------------|----------|------------------------------------|----------|
|        | $\beta$ (95%CI)     | <i>P</i> | Adjusted $\beta$ (95%CI)           | <i>P</i> |
| FPG    | 3.51 (2.24, 4.77)   | <0.001   | 1.83 (0.56, 3.10)                  | 0.005    |
| 1-h PG | 0.55 (0.22, 0.88)   | 0.001    | 0.42 (0.09, 0.75)                  | 0.012    |
| 2-h PG | -0.27 (-0.70, 0.17) | 0.235    | -0.28 (-0.72, 1.63)                | 0.202    |

<sup>a</sup> Adjusted for: maternal age, education, household income, BMI before pregnancy, gestational weight gain, first pregnancy, complications from previous pregnancy, insulin injection and gestational week.

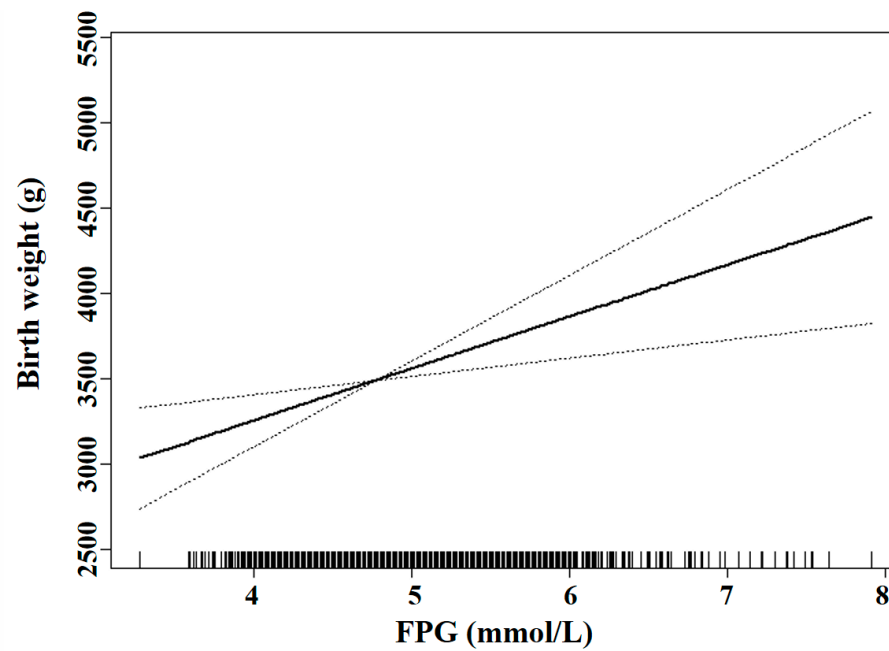

**Supplementary figure S1.** Association of FPG with birth weight by smoothing spline. Adjusted for: squared FPG.
